# Supplementary material for: Suppression of B-Cell Activation by Human Cord Blood-Derived Stem Cells (CB-SCs) through the Galectin-9-Dependent Mechanism
Source: MDPI journal article supplement (doi:10.3390/ijms25031830), 2024-02-02
Supplement: s1 [file s1]

## Supplementary data

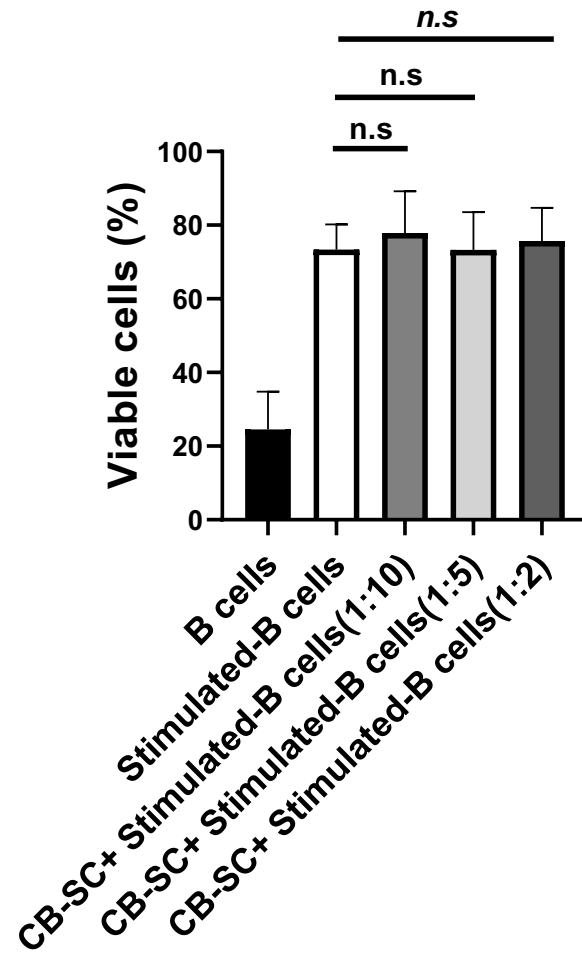

Figure S1: Effects of B cell death after treatment with different ratios of CB-SC. No increased in dead cell rate could be detected in activation cocktails treated group with or without CB-SC.

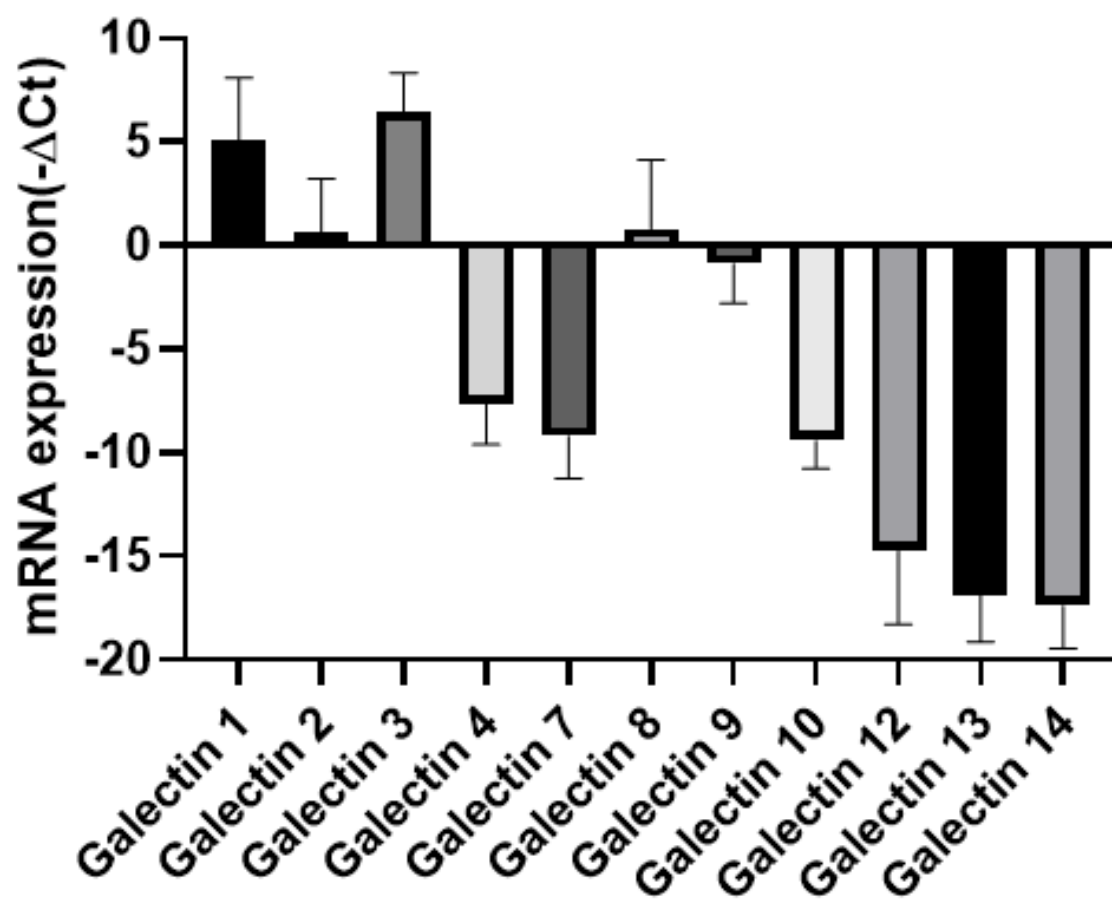

Figure S2: RT-PCR analysis of galectin expressions in CB-SC (N = 4).  $\beta$  actin served as control.

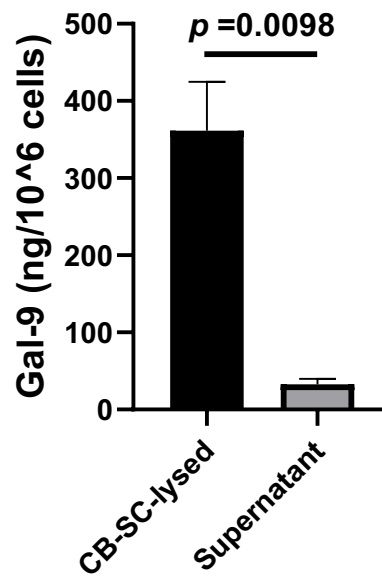

Figure S3: Galectin-9 expression in CB-SC and CB-SC culture supernatant. CB-SC released galectin-9 were less than 10% percentage of CB-SC contained galectin-9 after 3 days culture.

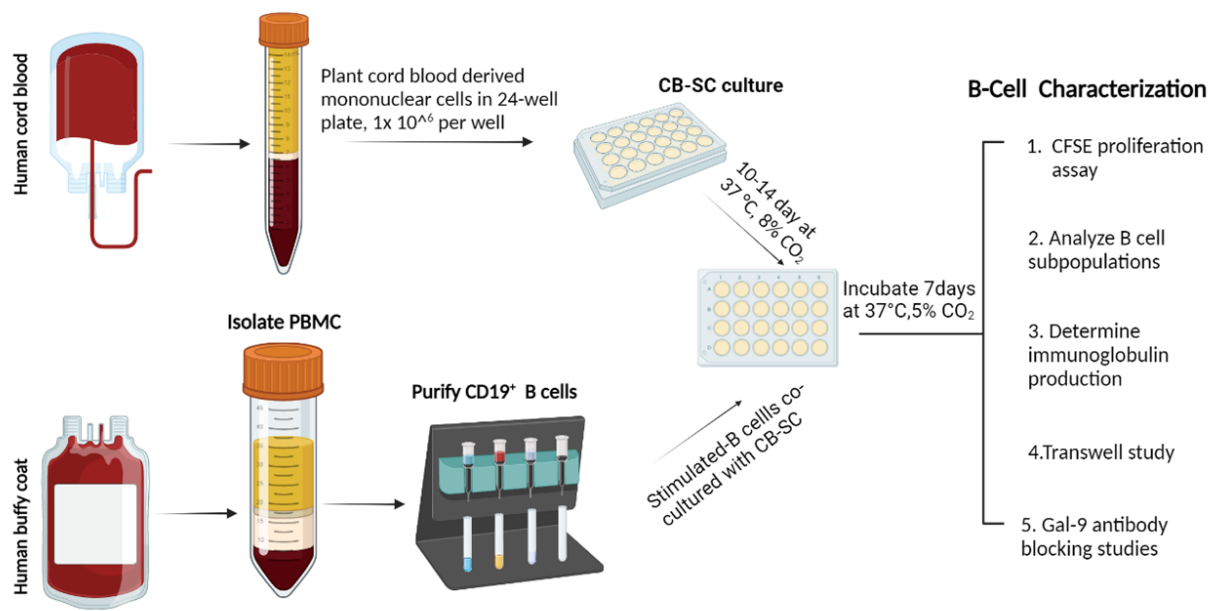

Figure S4. Outline of the whole protocol to determine the immune modulation of CB-SC on B cells.

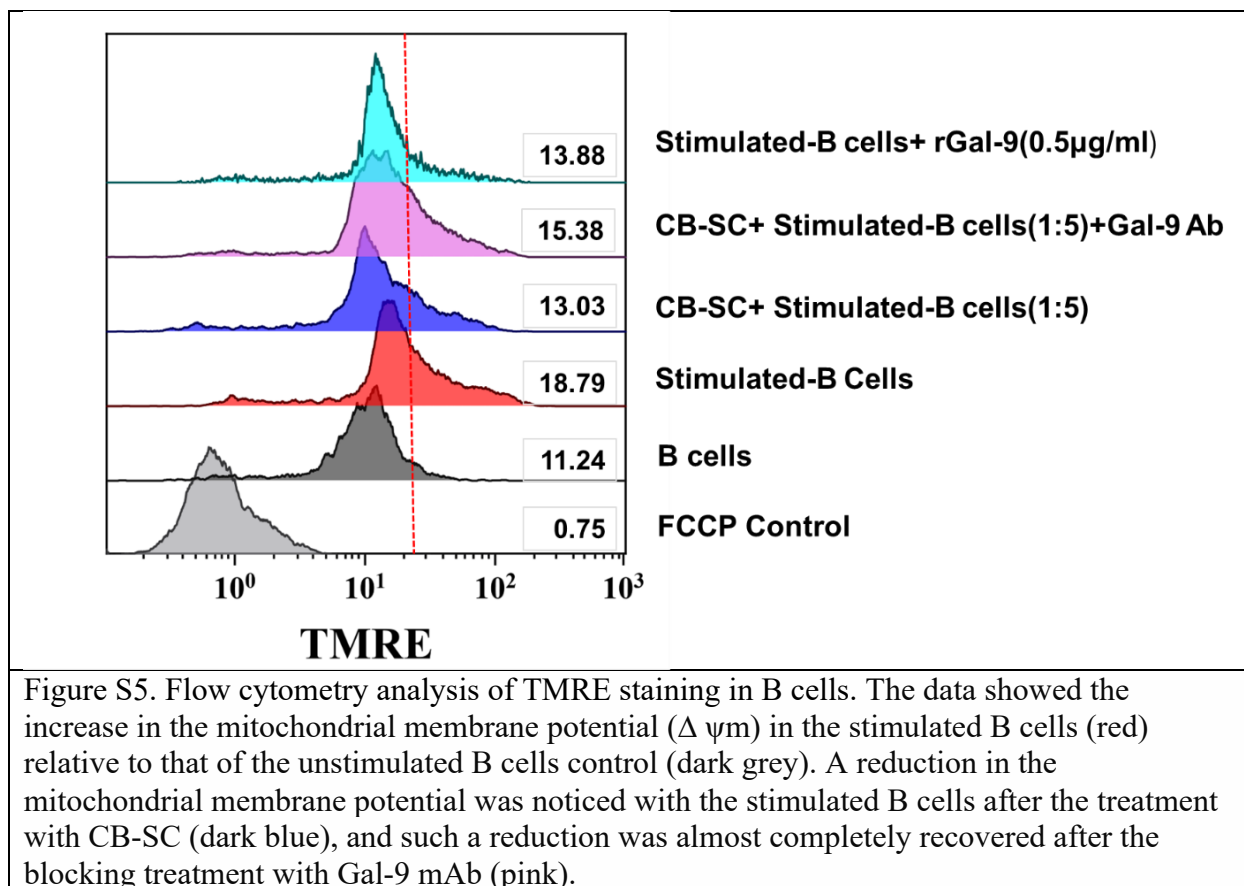

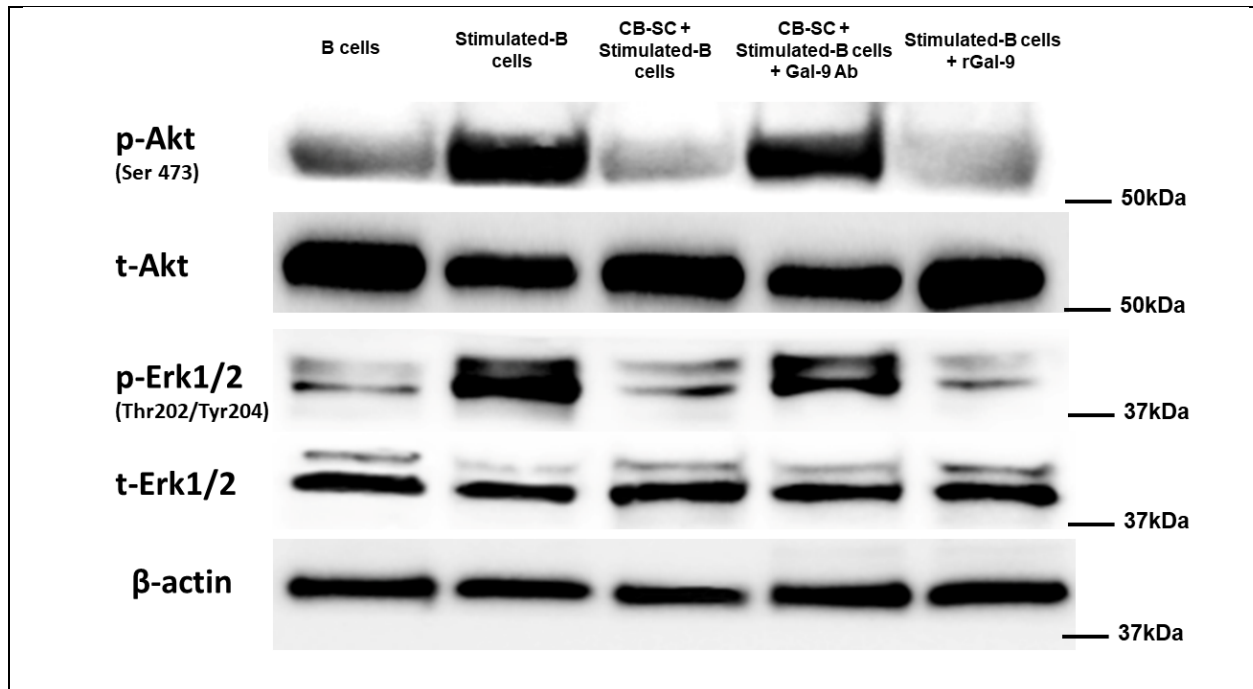

Figure S6. Western blotting showed the reduced expression of phosphorylated AKT and ERK1/2 in stimulated B cells after the treatment with CB-SC or rGal-9, but upregulated after blocking with Gal-9 mAb.  $\beta$ -actin served as control.

**Table S1. List of Reagents:**

| <b>No</b> | <b>Name of Reagents</b>                                                             | <b>Vendor/Manufacturer</b>            | <b>Catalogue</b> |
|-----------|-------------------------------------------------------------------------------------|---------------------------------------|------------------|
| 1         | CD19 MicroBeads, human                                                              | Miltenyi Biotec                       | 130-050-301      |
| 2         | Ficoll-Paque® PLUS Medium (1.076 g/ml Density; 1.078 g/ml Density Max.)             | VWR                                   | 95038-168        |
| 3         | X-VIVO™ 15 Serum-free Hematopoietic Cell Medium                                     | Lonza                                 | BP04-744Q        |
| 4         | AffiniPure F(ab') <sub>2</sub> Fragment Goat Anti-Human IgM, Fc5μ fragment specific | Jackson ImmunoResearch Laboratory Inc | 109-006-129      |
| 5         | Recombinant Human CD40L                                                             | BioLegend                             | 591706           |
| 6         | Recombinant Human IL-2                                                              | BioLegend                             | 589104           |
| 7         | Recombinant Human IL-10                                                             | BioLegend                             | 571004           |
| 8         | Recombinant Human IL-21                                                             | BioLegend                             | 571202           |
| 9         | CellTrace™ CFSE Cell Proliferation Kit, for flow cytometry                          | ThermoFisher Scientific               | C34554           |
| 10        | TheraPEAK™ ACK Lysing Buffer                                                        | Lonza                                 | BP10-548E        |
| 11        | RNeasy Mini Kit                                                                     | Qiagen                                | 74106            |
| 12        | iScript™ gDNA Clear cDNA Synthesis Kit                                              | BioRad                                | 1725034          |
| 13        | LEGENDplex™ Human Immunoglobulin Isotyping Panel (6-plex) with V-bottom Plate       | Biolegend                             | 740640           |
| 14        | Purified anti-human Galectin-9 Antibody                                             | Biolegend                             | 348902           |
| 15        | Fluo-4, AM, cell permeant                                                           | ThermoFisher Scientific               | F14201           |
| 16        | Rhod-2, AM, cell permeant                                                           | ThermoFisher Scientific               | R1244            |
| 17        | TMRE-Mitochondrial Membrane Potential Assay Kit                                     | Abcam                                 | ab113852         |
| 18        | Phospho-Akt (Ser473) (1:2000 dilution)                                              | Cell Signaling Technology             | 9271S            |
| 19        | Akt Antibody (1:2000 dilution)                                                      | Cell Signaling Technology             | 9272S            |
| 20        | p44/42 MAPK (Erk1/2) Antibody (1:2000 dilution)                                     | Cell Signaling Technology             | 9102S            |
| 21        | Phospho-p44/42 MAPK (Erk1/2) (Thr202/Tyr204) Antibody (1:2000 dilution)             | Cell Signaling Technology             | 9101S            |
| 22        | β-Actin (13E5) Rabbit mAb (HRP Conjugate) (1:2000 dilution)                         | Cell Signaling Technology             | 5125             |
| 23        | PhosSTOP                                                                            | Millipore Sigma                       | 4906845001       |
| 24        | Goat anti-Rabbit IgG (H+L) Secondary Antibody, HRP (1:10000 dilution)               | ThermoFisher Scientific               | 31460            |

|    |                                                                                             |                         |              |
|----|---------------------------------------------------------------------------------------------|-------------------------|--------------|
| 25 | CD45-PC7 (10 µL/sample at 1:10 dilution)                                                    | Beckman Coulter         | IM3548U      |
| 26 | OCT3/4 Monoclonal Antibody (EM92)-eFluor 660 (5 µL/sample at 1:20 dilution)                 | ThermoFisher Scientific | 50-5841-82   |
| 27 | SOX2 Monoclonal Antibody (Btjce), Alexa Fluor™ 488 (5 µL/sample at 1:20 dilution)           | ThermoFisher Scientific | 53-9811-82   |
| 28 | Brilliant Violet 421™ anti-human CD34 Antibody (5 µL/sample at 1:20 dilution)               | Biolegend               | 343610       |
| 29 | CD270 (HVEM) Monoclonal Antibody (LH1), PE (5 µL/sample at 1:20 dilution)                   | ThermoFisher Scientific | 12-5962-80   |
| 30 | CD274 (PD-L1, B7-H1) Monoclonal Antibody (MIH1), eFluor™ 450 (5 µL/sample at 1:20 dilution) | ThermoFisher Scientific | 48-5983-42   |
| 31 | APC anti-human IgD Antibody (5 µL/sample at 1:20 dilution)                                  | Biolegend               | 348222       |
| 32 | PE anti-human CD27 Antibody (5 µL/sample at 1:20 dilution)                                  | Biolegend               | 302808       |
| 33 | IgG1 Mouse anti-human FITC (10 µL/sample at 1:10 dilution)                                  | Beckman Coulter         | IM0639U      |
| 34 | IgG1 Mouse anti-human PE (10 µL/sample at 1:10 dilution)                                    | Beckman Coulter         | IM0670U      |
| 35 | IgG1 Mouse anti-human APC (10 µL/sample at 1:10 dilution)                                   | Beckman Coulter         | IM2475U      |
| 36 | IgG1 Mouse anti-human PC7 (10 µL/sample at 1:10 dilution)                                   | Beckman Coulter         | 6607099      |
| 37 | Mouse IgG1 kappa Isotype Control (P3.6.2.8.1), eFluor™ 450 (5 µL/sample at 1:20 dilution)   | ThermoFisher Scientific | 48-4714-82   |
| 38 | Rat IgG2 kappa Isotype Control eFluoro-660 (5 µL/sample at 1:20 dilution)                   | ThermoFisher Scientific | 50-4321-82   |
| 39 | BV421 Mouse IgG1, k isotype Control (5 µL/sample at 1:20 dilution)                          | BD Biosciences          | 562438       |
| 40 | Human BD Fc Block (5 µL/sample at 1:20 dilution)                                            | BD Biosciences          | 564220       |
| 41 | PerFix-nc (no centrifuge assay kit)                                                         | Beckman Coulter         | B31168       |
| 42 | Dulbecco's Phosphate Buffered Saline                                                        | VWR                     | 02-0119-0500 |



## Material and Methods:

### *Western blot*

Cells were lysed with the radioimmunoprecipitation assay (RIPA) buffer for Western blotting as previously described[36]. Cell sample of each group had three biological replicates with two technical replicates for each biological replicate (total N = 6 wells) and was combined together for one-time Western Blotting. Protein concentration was determined with a bicinchoninic acid (BCA) protein assay. The proteins were separated with 10% Tris-HCl gel (Bio-Rad, CA, USA) and transferred to the polyvinylidene fluoride membrane. The membrane was normally incubated with 5% non-fat dry milk (ShopRite, Keasbey, NJ, USA) for 30 mins to block the non-specific binding. The proteins were then blotted overnight with anti-human phospho-Akt and anti-human phospho-Erk1/2 mAbs (Cell Signaling, MA, USA) at 1:2000 dilution, followed by the incubation with anti-rabbit or anti-mouse horseradish peroxidase-conjugated secondary Ab (ThermoFisher scientific) at 1: 10000 dilution at room temp for two hours, respectively, and followed by washing with TBST [1]. The membrane was incubated with the chemiluminescent substrate (ThermoFisher Scientific, CA, USA) and the chemiluminescent signal was detected by using the ChemiDoc Imaging System (Bio-Rad, CA, USA).  $\beta$ -actin served as the internal controls.
